# Supplementary material for: Strategies for recovery of imbalanced full-scale biogas reactor feeding with palm oil mill effluent
Source: PeerJ. 2021 Jan 7;9:e10592. doi: 10.7717/peerj.10592 (PMC7797170; doi:10.7717/peerj.10592)
Supplement: Supplemental Information 1 [file peerj-09-10592-s001.xlsx]

## Sheet: SMA p.panit
					100mL มีVS 4		ace.มี 1.0575gCODได้จาก Sub.1g					ค่าทษ. 1 g substrate	ได้ COD เท่าไร
					50mL มีVS 2	เอา 2gVS หาร 10 เพื่อ 10:1	ace.มี 0.2 gCODได้จาก Sub.0.1891g
Substrate	Total volume	Inoculums (mL)	Substrate (mL)	ต้องการ Ratio (VS/COD)	Inoculums (g-VS)	Substrate (g-COD)	Substrate (g)		Inoculums			Substrate	COD (gCOD/gsubstrate)
Acetic acid	55	50	5	10:1	2	0.2	0.189125	945.626	TS%	3		Acetic	1.0575
Avicel	55	50	5	10:1	2	0.2	0.0916086	458.043	VS%	4		Avicel	2.1832
Glucose	55	50	5	10:1	2	0.2	0.0968617	484.308				Glucose	2.0648
Glelatin	55	50	5	10:1	2	0.2	0.2	1000				Glelatin	1
H2+CO2	55	50	5	10:1	2	0.2	0.0125	62.5				H2+CO2	16
Negative control	55	50	5		2
Positive control	55	50			2		2% of avicel					Substrate	COD (gCOD/gsubstrate)
Total		300					เรารู้ gCOD ต้องการหา gSubstrate					Acetate	1.0575
				5	0.2							Propionate	1.5119
เตรียม Stock solution		100ml		1000	40							Butyrate	1.816
Stock solution	Substrate (g)	ต้องเติม water (mL)	Total volume	Substrate (g)		Inoc VS 4%	100	4				Glucose	2.0648
Acetic	3.78251	96.2175	100	0.189125			50	2				Cellulose	2.1832
Avicel	1.83217	98.1678	100	0.0916086
Glucose	1.93723	98.0628	100	0.0968617		Acetic 1.0575	1.0575	1
Glelatin	4	96	100	0.2		gCOD/g-substrate	0.2	0.189125
	5mLใส่ substrate	0.1891 g
	100mLใส่ substrate	3.782

## Sheet: SMA p.panit 1
					biogas
p.panit
hr	Acetic.1	Avicel.1	Glucose.1	Glelatin.1	Negative	Acetic.2	Avicel.2	Glucose.2	Glelatin.2
0	0	0	0	0	0	0	0	0	0
24	20	10	18	10	4	16	10	24	10
48	22	10	20	20	10	12	10	20	20
72	18	10	18	18	10	18	10	16	18
96	16	12	14	14	10	18	12	18	14
120	16	18	14	16	10	16	18	18	12
144	14	20	12	10	10	16	18	14	10
	ลบ nega						%CH4
p.panit						p.panit
Acetic	Avicel	Glucose	Glelatin			Acetic	Avicel	Glucose	Glelatin
0	0	0	0			0	0	0	0
14	6	17	6			5.63	3.64	8.64	3.23
7	0	10	10			13.45	11.57	15.76	12.63
8	0	7	8			22.06	19.41	22.57	17.47
7	2	6	4			37.2	33.49	34.95	29.56
6	8	6	4			45.23	33.45	44.54	35.87
5	9	3	1			53.24	34.42	53.53	50.32
		mL-CH4					CH4 yield (mLCH4/gCOD)
p.panit						p.panit
hr	Acetic acid	Avicel	Glucose	Glelatin		hr	Acetic acid	Avicel	Glucose	Glelatin
0	0	0	0	0		0	0	0	0	0
24	0.7882	0.2184	1.4688	0.1938		24	3.941	1.092	7.344	0.969
48	0.9415	0	1.576	1.263		48	4.7075	0	7.88	6.315
72	1.7648	0	1.5799	1.3976		72	8.824	0	7.8995	6.988
96	2.604	0.6698	2.097	1.1824		96	13.02	3.349	10.485	5.912
120	2.7138	2.676	2.6724	1.4348		120	13.569	13.38	13.362	7.174
144	2.662	3.0978	1.6059	0.5032		144	13.31	15.489	8.0295	2.516
					Total yield (mLCH4/gCOD)		57.3715	33.31	55	29.874
		mL-CH4				1	PV=nRT
p.panit							n=PV/RT					n (mol)
hr	Acetic acid	Avicel	Glucose	Glelatin			P=1 atm					hr	Acetic acid	Avicel	Glucose	Glelatin
0	0	0	0	0			V= volumn (L)					0	0	0	0	0
24	0.7882	0.2184	1.4688	0.1938			R= 0.0821 (L-atm/K-mol)					24	2.90895	0.806032	5.42078	0.715242
48	0.9415	0	1.576	1.263			T= Kalvin (K=273+oC)					48	3.47472	0	5.81642	4.66125
72	1.7648	0	1.5799	1.3976								72	6.51321	0	5.83081	5.15801
96	2.604	0.6698	2.097	1.1824		2	แปลง mol เป็น mL					96	9.61038	2.47198	7.73923	4.36379
120	2.7138	2.676	2.6724	1.4348			1 mol มีแก๊ส 22.4 L					120	10.0156	9.8761	9.86282	5.2953
144	2.662	3.0978	1.6059	0.5032								144	9.82443	11.4328	5.92677	1.85712
						3	เทียบ กับค่าทฤษฎี 1 g COD ได้มีเทน 350 mL
Combusion CH4+2O2--> CO2+2H2O							CH4 350 mL ได้จาก 1 g COD						mL
												hr	Acetic acid	Avicel	Glucose	Glelatin
						4	SMA (g-COD/gVSS)					0	0	0	0	0
												24	66.0331	18.2969	123.052	16.236
												48	78.8761	0	132.033	105.81
												72	147.85	0	132.359	117.087
												96	218.156	56.1139	175.681	99.058
												120	227.354	224.188	223.886	120.203
												144	223.015	259.525	134.538	42.1566
																		37 g/L
												g-COD						g-VSSadded			g-COD/g-VSSadded
												hr	Acetic acid	Avicel	Glucose	Glelatin		1.85		hr	Acetic acid	Avicel	Glucose	Glelatin
												0	0	0	0	0		1.85		0	0	0	0	0
												24	0.188666	0.0522769	0.351577	0.0463886	หาร	1.85		24	0.101982	0.0282578	0.190041	0.0250749
												48	0.22536	0	0.377236	0.302316		1.85		48	0.121816	0	0.203912	0.163414
												72	0.422428	0	0.37817	0.334534		1.85		72	0.22834	0	0.204416	0.180829
												96	0.623302	0.160325	0.501945	0.283023		1.85		96	0.33692	0.0866624	0.271321	0.152985
												120	0.649584	0.640536	0.639674	0.343438		1.85		120	0.351126	0.346236	0.34577	0.185642
												144	0.637185	0.741499	0.384393	0.120448		1.85		144	0.344424	0.40081	0.20778	0.0651068
															g-VSSadded	g-COD	mL-CH4	mL-CH4/ g-COD	g-COD/g-VSSadded
														Acetic acid	1.85	0.637185	2.662	57.3715	0.344424
														Avicel	1.85	0.741499	3.0978	33.31	0.40081
														Glucose	1.85	0.384393	1.6059	55	0.20778
														Glelatin	1.85	0.120448	0.5032	29.874	0.0651068

## Sheet: SMA test
Data_S1 Detailed Information of of specific methanogenic activity (SMA) of inhibited microbial sludge, self-recovery sludge and the recovered sludge with various methods.
									biogas			%CH4					_(Negative)					mL-CH4						Accumulative CH4						CH4 yield (mLCH4/gCOD)						mol						mL-CH4
Self-recovery												Self-recovery					Self-recovery					Self-recovery						Self-recovery						Self-recovery						hr	n (mol)					hr	mL
hr	Acetic.1	Acetic.2	Avicel.1	Avicel.2	Glucose.1	Glucose.2	Glelatin.1	Glelatin.2	Negative1	Negative2		Acetic	Avicel	Glucose	Glelatin		Acetic	Avicel	Glucose	Glelatin		hr	Acetic acid	Avicel	Glucose	Glelatin		hr	Acetic acid	Avicel	Glucose	Glelatin		hr	Acetic acid	Avicel	Glucose	Glelatin			Acetic acid	Avicel	Glucose	Glelatin			Acetic acid	Avicel	Glucose
0	0	0	0	0	0	0	0	0	0	0		0	0	0	0		0	0	0	0		0	0	0	0	0		0	0	0	0	0		0	0	0	0	0		0	0	0	0	0		0	0	0	0
24	12	12	10	10	18	16	10	8	4	4		5.63	7.25	8.64	3.23		8	6	13	5		24	0.4504	0.435	1.1232	0.1615		24	0.4504	0.435	1.1232	0.1615		24	2.252	2.175	5.616	0.8075		24	1.66226	1.60542	4.14531	0.596035		24	37.2345	35.9614	92.8548
48	20	20	18	18	20	22	20	18	10	8		13.45	15.07	15.76	12.63		11	9	12	10		48	1.4795	1.3563	1.8912	1.263		48	1.9299	1.7913	3.0144	1.4245		48	9.6495	8.9565	15.072	7.1225		48	5.46027	5.00559	6.9797	4.66125		48	122.31	112.125	156.345
72	20	20	18	18	18	16	18	18	10	8		21.06	23.68	22.57	17.47		11	9	8	9		72	2.3166	2.1312	1.8056	1.5723		72	4.2465	3.9225	4.82	2.9968		72	21.2325	19.6125	24.1	14.984		72	8.54969	7.86545	6.66379	5.80276		72	191.513	176.186	149.269
96	12	12	14	14	14	12	14	14	10	10		25.22	38.82	34.95	29.56		2	4	3	4		96	0.5044	1.5528	1.0485	1.1824		96	4.7509	5.4753	5.8685	4.1792		96	23.7545	27.3765	29.3425	20.896		96	1.86155	5.7308	3.86962	4.36379		96	41.6987	128.37	86.6794
120	14	14	15	15	14	14	16	14	10	8		35.23	46.85	44.54	30.87		4	6	5	6		120	1.4092	2.811	2.227	1.8522		120	6.1601	8.2863	8.0955	6.0314		120	30.8005	41.4315	40.4775	30.157		120	5.20082	10.3743	8.21901	6.83577		120	116.498	232.385	184.106
144	20	20	12	10	10	12	10	14	10	8		33.54	43.04	40.5	31.12		11	2	2	3		144	3.6894	0.8608	0.81	0.9336		144	9.8495	9.1471	8.9055	6.965		144	49.2475	45.7355	44.5275	34.825		144	13.6162	3.17689	2.9894	3.44556		144	305.002	71.1623	66.9626
																																	Total yield (mLCH4/gCOD)		49.2475	45.7355	44.5275	34.825
Dilution with BE 8:2												Dilution with BE 8:2					Dilution with BE 8:2					Dilution with BE 8:2						Dilution with BE 8:2						Dilution with BE 8:2						hr	n (mol)					hr	mL
hr	Acetic.1	Acetic.2	Avicel.1	Avicel.2	Glucose.1	Glucose.2	Glelatin.1	0	Negative1	Negative2		Acetic	Avicel	Glucose	Glelatin		Acetic	Avicel	Glucose	Glelatin		hr	Acetic acid	Avicel	Glucose	Glelatin		hr	Acetic acid	Avicel	Glucose	Glelatin		hr	Acetic acid	Avicel	Glucose	Glelatin			Acetic acid	Avicel	Glucose	Glelatin			Acetic acid	Avicel	Glucose
0	0	0	0	0	0	0	0	0	0	0		0	0	0	0		0	0	0	0		0	0	0	0	0		0	0	0	0	0		0	0	0	0	0		0	0	0	0	0		0	0	0	0
24	22	24	12	14	24	22	16	14	4	4		9.93	10.55	11.94	7.23		19	9	19	11		24	1.8867	0.9495	2.2686	0.7953		24	1.8867	0.9495	2.2686	0.7953		24	9.4335	4.7475	11.343	3.9765		24	6.9631	3.50424	8.37254	2.93515		24	155.973	78.4951	187.545
48	24	26	12	14	20	26	20	22	10	8		17.75	18.37	19.06	16.63		16	4	14	12		48	2.84	0.7348	2.6684	1.9956		48	4.7267	1.6843	4.937	2.7909		48	23.6335	8.4215	24.685	13.9545		48	10.4814	2.71187	9.84805	7.365		48	234.783	60.7459	220.596
72	20	22	12	14	18	22	18	16	10	8		25.36	26.98	25.87	21.47		12	4	11	8		72	3.0432	1.0792	2.8457	1.7176		72	7.7699	2.7635	7.7827	4.5085		72	38.8495	13.8175	38.9135	22.5425		72	11.2313	3.98292	10.5024	6.33901		72	251.581	89.2174	235.254
96	18	20	14	16	18	18	14	18	10	10		40.5	42.12	40.25	33.56		9	5	8	6		96	3.645	2.106	3.22	2.0136		96	11.4149	4.8695	11.0027	6.5221		96	57.0745	24.3475	55.0135	32.6105		96	13.4523	7.77245	11.8838	7.43143		96	301.332	174.103	266.197
120	18	20	20	22	22	26	16	18	10	8		41.21	43.11	44.23	35.34		9	12	15	8		120	3.7089	5.1732	6.6345	2.8272		120	15.1238	10.0427	17.6372	9.3493		120	75.619	50.2135	88.186	46.7465		120	13.6881	19.0923	24.4854	10.4341		120	306.614	427.668	548.474
144	24	21	20	18	14	13	12	14	10	8		42.45	44.24	43.56	28.12		13.5	10	4.5	4		144	5.73075	4.424	1.9602	1.1248		144	20.8545	14.4667	19.5974	10.4741		144	104.273	72.3335	97.987	52.3705		144	21.15	16.3273	7.23436	4.15121		144	473.761	365.732	162.05
																																	Total yield (mLCH4/gCOD)		104.273	72.3335	97.987	52.3705
									biogas				%CH4					_ (Negative)						mL-CH4					Accumulative CH4						CH4 yield (mLCH4/gCOD)
0.04%w/v NaOH												0.04%NaOH					0.04%NaOH					0.04%NaOH						0.04%NaOH						0.04%NaOH						hr	n (mol)					hr	mL
hr	Acetic.1	Acetic.2	Avicel.1	Avicel.2	Glucose.1	Glucose.2	Glelatin.1	Glelatin.2	Negative1	Negative2		Acetic	Avicel	Glucose	Glelatin		Acetic	Avicel	Glucose	Glelatin		hr	Acetic acid	Avicel	Glucose	Glelatin		hr	Acetic acid	Avicel	Glucose	Glelatin		hr	Acetic acid	Avicel	Glucose	Glelatin			Acetic acid	Avicel	Glucose	Glelatin			Acetic acid	Avicel	Glucose
0	0	0	0	0	0	0	0	0	0	0		0	0	0	0		0	0	0	0		0	0	0	0	0		0	0	0	0	0		0	0	0	0	0		0	0	0	0	0		0	0	0	0
24	26	25	24	25	26	26	10	12	4	4		12.37	13.99	15.38	12.23		21.5	20.5	22	7		24	2.65955	2.86795	3.3836	0.8561		24	2.65955	2.86795	3.3836	0.8561		24	13.2977	14.3397	16.918	4.2805		24	9.81539	10.5845	12.4876	3.15954		24	219.865	237.093	279.722
48	32	31	26	30	24	24	20	22	10	8		20.19	21.81	22.5	21.63		22.5	19	15	12		48	4.54275	4.1439	3.375	2.5956		48	7.2023	7.01185	6.7586	3.4517		48	36.0115	35.0592	33.793	17.2585		48	16.7656	15.2936	12.4558	9.57938		48	375.549	342.576	279.011
72	33	31	28	33	28	28	18	20	10	8		28.8	30.42	29.31	26.47		23	21.5	19	10		72	6.624	6.5403	5.5689	2.647		72	13.8263	13.5522	12.3275	6.0987		72	69.1315	67.7608	61.6375	30.4935		72	24.4467	24.1378	20.5527	9.76907		72	547.606	540.686	460.38
96	34	36	22	23	24	24	14	16	10	10		43.94	45.56	41.69	38.56		25	12.5	14	5		96	10.985	5.695	5.8366	1.928		96	24.8113	19.2472	18.1641	8.0267		96	124.057	96.2357	90.8205	40.1335		96	40.5415	21.0181	21.5407	7.11552		96	908.129	470.805	482.511
120	28	25	24	20	20	24	16	18	10	8		43.22	44.21	42.45	39.87		16.5	13	13	8		120	7.1313	5.7473	5.5185	3.1896		120	31.9426	24.9945	23.6826	11.2163		120	159.713	124.972	118.413	56.0815		120	26.3189	21.2111	20.3667	11.7716		120	589.544	475.129	456.214
144	21	23	20	21	12	16	10	12	10	8		42.98	43.98	44.67	27.98		13	11.5	5	2		144	5.5874	5.0577	2.2335	0.5596		144	37.53	30.0522	25.9161	11.7759		144	187.65	150.261	129.581	58.8795		144	20.621	18.6661	8.243	2.06527		144	461.91	418.12	184.643
																																	Total yield (mLCH4/gCOD)		187.65	150.261	129.581	58.8795
									biogas				%CH4					_ (Negative)						mL-CH4					Accumulative CH4						CH4 yield (mLCH4/gCOD)
0.50%w/v CaOH2												0.50%CaOH2					0.50%CaOH2					0.50%CaOH2						0.50%CaOH2						0.50%CaOH2						hr	n (mol)					hr	mL
hr	Acetic.1	Acetic.2	Avicel.1	Avicel.2	Glucose.1	Glucose.2	Glelatin.1	Glelatin.2	Negative1	Negative2		Acetic	Avicel	Glucose	Glelatin		Acetic	Avicel	Glucose	Glelatin		hr	Acetic acid	Avicel	Glucose	Glelatin		hr	Acetic acid	Avicel	Glucose	Glelatin		hr	Acetic acid	Avicel	Glucose	Glelatin			Acetic acid	Avicel	Glucose	Glelatin			Acetic acid	Avicel	Glucose
0	0	0	0	0	0	0	0	0	0	0		0	0	0	0		0	0	0	0		0	0	0	0	0		0	0	0	0	0		0	0	0	0	0		0	0	0	0	0		0	0	0	0
24	32	34.2	34	32	26	24	16	16	4	4		15.92	17.54	18.93	16.23		29.1	29	21	12		24	4.63272	5.0866	3.9753	1.9476		24	4.63272	5.0866	3.9753	1.9476		24	23.1636	25.433	19.8765	9.738		24	17.0976	18.7727	14.6713	7.18785		24	382.987	420.509	328.638
48	34	36.2	36	34	28	26	26	26	10	8		23.74	25.36	26.05	25.63		26.1	26	18	17		48	6.19614	6.5936	4.689	4.3571		48	10.8289	11.6802	8.6643	6.3047		48	54.1443	58.401	43.3215	31.5235		48	22.8676	24.3345	17.3053	16.0804		48	512.234	545.092	387.639
72	30	32.2	32	30	26	24	24	24	10	8		32.35	33.97	32.86	30.47		22.1	22	16	15		72	7.14935	7.4734	5.2576	4.5705		72	17.9782	19.1536	13.9219	10.8752		72	89.891	95.768	69.6095	54.376		72	26.3855	27.5815	19.4038	16.868		72	591.036	617.825	434.645
96	28	30.2	30	28	22	20	20	20	10	10		47.49	49.11	45.24	33.12		19.1	19	11	10		96	9.07059	9.3309	4.9764	3.312		96	27.0488	28.4845	18.8983	14.1872		96	135.244	142.422	94.4915	70.936		96	33.4761	34.4368	18.366	12.2233		96	749.865	771.385	411.399
120	28	30.2	30	28	22	20	22	22	10	8		45.54	48.32	44.54	39.88		19.1	20	12	13		120	8.69814	9.664	5.3448	5.1844		120	35.7469	38.1485	24.2431	19.3716		120	178.735	190.742	121.215	96.858		120	32.1015	35.6662	19.7256	19.1337		120	719.074	798.922	441.854
144	26	28.2	28	26	20	18	11	12	10	8		44.57	47.98	46.32	35.23		18.1	18	10	2.5		144	8.06717	8.6364	4.632	0.88075		144	43.8141	46.7849	28.8751	20.2523		144	219.071	233.924	144.375	101.262		144	29.7729	31.8737	17.095	3.25051		144	666.912	713.97	382.927
																																	Total yield (mLCH4/gCOD)		219.071	233.924	144.375	101.262
									biogas				%CH4					_ (Negative)						mL-CH4					Accumulative CH4						CH4 yield (mLCH4/gCOD)
8.0%w/v palm oil ash												8.0%ash					8.0%ash					8.0%ash						8.0%ash						8.0%ash						hr	n (mol)					hr	mL
hr	Acetic.1	Acetic.2	Avicel.1	Avicel.2	Glucose.1	Glucose.2	Glelatin.1	Glelatin.2	Negative1	Negative2		Acetic	Avicel	Glucose	Glelatin		Acetic	Avicel	Glucose	Glelatin		hr	Acetic acid	Avicel	Glucose	Glelatin		hr	Acetic acid	Avicel	Glucose	Glelatin		hr	Acetic acid	Avicel	Glucose	Glelatin			Acetic acid	Avicel	Glucose	Glelatin			Acetic acid	Avicel	Glucose
0	0	0	0	0	0	0	0	0	0	0		0	0	0	0		0	0	0	0		0	0	0	0	0		0	0	0	0	0		0	0	0	0	0		0	0	0	0	0		0	0	0	0
24	40	42	42	40	22	25	14	14	4	4		19.58	21.2	18.84	14.18		37	37	19.5	10		24	7.2446	7.844	3.6738	1.418		24	7.2446	7.844	3.6738	1.418		24	36.223	39.22	18.369	7.09		24	26.7371	28.9492	13.5586	5.2333		24	598.91	648.463	303.713
48	45	44	47	45	24	27	22	22	10	8		27.4	29.02	25.96	21.58		35.5	37	16.5	13		48	9.727	10.7374	4.2834	2.8054		48	16.9716	18.5814	7.9572	4.2234		48	84.858	92.907	39.786	21.117		48	35.8987	39.6277	15.8084	10.3537		48	804.13	887.66	354.108
72	36	38	38	36	26	29	20	20	10	8		36.01	37.63	32.77	29.42		28	28	18.5	11		72	10.0828	10.5364	6.06245	3.2362		72	27.0544	29.1178	14.0196	7.4596		72	135.272	145.589	70.0982	37.298		72	37.2118	38.8859	22.3742	11.9436		72	833.544	871.043	501.182
96	26	28	24	22	28	31	22	22	10	10		54.15	50.12	49.32	32.78		17	13	19.5	12		96	9.2055	6.5156	9.6174	3.9336		96	36.2599	35.6334	23.637	11.3932		96	181.299	178.167	118.185	56.966		96	33.974	24.0466	35.4942	14.5174		96	761.018	538.644	795.07
120	27	28	24	26	26	22	18	18	10	8		46.22	48.99	50.12	35.22		17.5	16	15	9		120	8.0885	7.8384	7.518	3.1698		120	44.3484	43.4718	31.155	14.563		120	221.742	217.359	155.775	72.815		120	29.8516	28.9286	27.7461	11.6985		120	668.676	648	621.512
144	30	26	24	26	20	24	12	12	10	8		45.12	48.21	51.22	36.11		19	16	13	3		144	8.5728	7.7136	6.6586	1.0833		144	52.9212	51.1854	37.8136	15.6463		144	264.606	255.927	189.068	78.2315		144	31.639	28.468	24.5744	3.99805		144	708.713	637.683	550.466
																																	Total yield (mLCH4/gCOD)		264.606	255.927	189.068	78.2315
[truncated: 19 more columns]
